# Supplementary material for: Quantification of alcohol intake in patients with steatotic liver disease and excessive alcohol intake
Source: PubMed Central journal article supplement — JHEP Rep. 2024 Sep 2;7(1):101200. doi: 10.1016/j.jhepr.2024.101200 (PMC11652777; doi:10.1016/j.jhepr.2024.101200), 2024-09-02
Supplement: mmc1.pdf [file mmc1.pdf]

# Quantification of alcohol intake in patients with steatotic liver disease and excessive alcohol intake

**Emil Deleuran Hansen, Nikolaj Torp, Stine Johansen, Johanne Kragh Hansen, Marianne Lerbæk Bergmann, Camilla Dalby Hansen, Sönke Detlefsen Peter Andersen, Ida Villesen, Katrine Bech, Katrine Thorhauge, Gitte Hedegaard Jensen, Katrine Prier Lindvig, Torben Hansen, Emmanuel A. Tsochatzis, Jonel Trebicka, Maja Thiele, Aleksander Krag, Mads Israelsen, on behalf of the GALAXY and MicrobLiver consortia**

## Table of contents

|                |   |
|----------------|---|
| Table S1 ..... | 2 |
| Table S2 ..... | 3 |
| Table S3 ..... | 4 |
| Fig. S1 .....  | 5 |
| Fig. S2 .....  | 6 |
| Fig. S3 .....  | 7 |

**Table S1** Self-reported alcohol intake interview

|                                                                                            |
|--------------------------------------------------------------------------------------------|
| <b>GALA-RIF trial:</b>                                                                     |
| How many years have you had an excessive use of alcohol?* .....(1-5/6-10/11-20/21-30/+30)  |
| Have you stopped drinking alcohol? (≥6 months).....(Yes/No)                                |
| If no, how much alcohol do you drink at the moment? (Units/day)** ..... (Number)           |
| <b>ReFerm trial:</b>                                                                       |
| How many years have you had an excessive use of alcohol?* ..... (Number)                   |
| Have you stopped drinking alcohol? (≥6 months).....(Yes/No)                                |
| If no, how much alcohol have you been drinking the last week? (Units/week)** .....(Number) |

\*Only asked at baseline.

\*\* Categorized as abstinence ≥ 1 week, if zero consumption is reported

| <b>Table S2</b> Baseline participant characteristic between trials |                  |                   |                     |
|--------------------------------------------------------------------|------------------|-------------------|---------------------|
|                                                                    | <b>Total</b>     | <b>GALA-RIF</b>   | <b>GALA-POSTBIO</b> |
|                                                                    | N=192            | N=136             | N=56                |
| Age at inclusion, years                                            | 60 (55-66)       | 58 (53-65)        | 63 (57-67)          |
| Sex, male                                                          | 161 (84%)        | 114 (84%)         | 47 (84%)            |
| Body mass index, kg/m <sup>2</sup>                                 | 29 (25-33)       | 29 (25-33)        | 30 (25-33)          |
| Smoking                                                            |                  |                   |                     |
| <i>Never smoker</i>                                                | 51 (26%)         | 41 (30%)          | 10 (18%)            |
| <i>Previous smoker</i>                                             | 67 (35%)         | 42 (31%)          | 25 (45%)            |
| <i>Current smoker</i>                                              | 68 (35%)         | 53 (39%)          | 15 (27%)            |
| <i>Missing</i>                                                     | 6 (3%)           |                   | 6 (11%)             |
| Diabetes type 2, n                                                 | 34 (17%)         | 25 (18%)          | 9 (16%)             |
| Cardiometabolic risk factors*, n                                   | 186 (97%)        | 133 (98%)         | 53 (95%)            |
| <i>BMI ≥ 25, n</i>                                                 | 148 (77%)        | 106 (78%)         | 42 (75%)            |
| <i>Insulin resistance, n</i>                                       | 153 (80%)        | 108 (79%)         | 45 (81%)            |
| <i>Hypertension, n</i>                                             | 100 (52%)        | 66 (49%)          | 34 (61%)            |
| <i>Hypertriglyceridemia, n</i>                                     | 150 (78%)        | 128 (94%)         | 22 (40%)            |
| <i>HDL-hypocholesterolemia, n</i>                                  | 155 (81%)        | 127 (93%)         | 28 (60%)            |
| Alanine transaminase (ALAT), U/L                                   | 35.0 (24.0-56.0) | 39.0 (26.0-60.0)  | 30.5 (21.5-51.5)    |
| Gamma-glutamyltransferase (GGT), U/L                               | 115 (54.5-291.5) | 101 (50-246)      | 146 (68-411)        |
| Alkaline phosphatase, U/L                                          | 72.5 (55.5-95.0) | 80.5 (67.0 -99.0) | 38.0 (26.0-55.0)    |
| Bilirubin, U/L                                                     | 11 (7-15)        | 11 (7-14)         | 12 (8-19)           |
| Platelets, 10 <sup>9</sup> /L                                      | 202 (165-244)    | 222 (180-257)     | 153.5 (121-194)     |
| INR                                                                | 1.0 (1.0-1.1)    | 1.0 (0.9-1.1)     | 1.1 (1.0-1.2)       |
| Albumin, g/L                                                       | 43 (41-46)       | 43 (41-46)        | 44 (41-46)          |
| Kleiner fibrosis stage:                                            |                  |                   |                     |
| <i>F0</i>                                                          | 7 (3.6%)         | 7 (5.1%)          | 0 (0%)              |
| <i>F1</i>                                                          | 37 (19.3%)       | 37 (27.2%)        | 0 (0%)              |
| <i>F2</i>                                                          | 67 (34.9%)       | 63 (46.3%)        | 4 (7.1%)            |
| <i>F3</i>                                                          | 38 (19.8%)       | 23 (16.9%)        | 15 (26.8%)          |
| <i>F4</i>                                                          | 39 (20.3%)       | 6 (4.4%)          | 33 (58.9%)          |
| <i>Missing</i>                                                     | 4 (2.1%)         | 0                 | 4 (7.1%)            |
| Transient elastography (FibroScan), kPa                            | 11.4 (7.9-18.4)  | 9.0 (6.6-12.1)    | 21.1 (15.5-35.0)    |
| CAP score, dB/m                                                    | 304 (±60.6)      | 309 (±60.3)       | 294 (±60.4)         |
| <b>Alcohol</b>                                                     |                  |                   |                     |
| Abstinence for ≥ 6 months before inclusion, n                      | 32 (20%)         | 16 (12%)          | 16 (64%)            |
| Alcohol intake for non-abstinent, grams/day                        | 42.9 (24.0-68.6) | 48.0 (24.0-85.7)  | 36.0 (12.0-51.4)    |
| Years of excessive alcohol intake:                                 |                  |                   |                     |
| 1-5 years                                                          | 19 (9.9%)        | 16 (11.8%)        | 3 (5.4%)            |
| 6-10 years                                                         | 28 (14.6%)       | 19 (14.0%)        | 9 (16.1%)           |
| 11-20 years                                                        | 49 (25.5%)       | 38 (27.9%)        | 11 (19.6%)          |
| 21-30 years                                                        | 40 (20.8%)       | 31 (22.8%)        | 9 (16.1%)           |
| >30 years                                                          | 47 (24.5%)       | 31 (22.8%)        | 16 (28.6%)          |
| Missing                                                            | 9 (4.7%)         | 1 (0.7%)          | 8 (14.3%)           |
| Phosphatidylethanol, μmol/L                                        | 0.5 (0.0-1.3)    | 0.5 (0.1-1.5)     | 0.2 (0.0-1.0)       |
| Carbohydrate-deficient transferrin, %CDT                           | 1.9 (1.6-2.3)    | 1.9 (1.6-2.3)     | n/a                 |
| Participants with valid Phosphatidylethanol at baseline, n         | 175 (91%)        | 122 (90%)         | 53 (95%)            |

Values are reported as mean ± standard deviation, counts (proportion), and median (IQR).  
 \*Cardiometabolic criteria as BMI ≥ 25 kg/m<sup>2</sup>; insulin resistance, fasting serum glucose ≥5.6 mmol/L or HbA1c ≥ 39 mmol/L or type 2 diabetes or treatment for type 2 diabetes; hypertension, blood pressure > 135/85 mmHg or antihypertensive drugs; hypertriglyceridemia, plasma triglycerides ≥1.70 mmol/L or lipid lowering treatment; hypercholesterolemia, Plasma HDL-cholesterol ≤ 1.0 mmol/L (male) and 1.3 mmol/L (female) or lipid lowering treatment. (3).  
 Abbreviations: CAP, Controlled Attenuation Parameter; INR, international normalized ratio; n/a, not available.

**Table S3** Agreement on abstinence between self-reported alcohol intake, PEth and CDT.

|                  | Self-reported $\geq$ 1 week abstinence | Self-reported $\geq$ 6 months abstinence |
|------------------|----------------------------------------|------------------------------------------|
| PEth < 0.05      | 44 of 73 (60%)                         | 27 of 32 (84%)                           |
| PEth $\geq$ 0.05 | 29 of 73 (40%)                         | 5 of 32 (16%)                            |
|                  |                                        |                                          |
| CDT* < 1.7%      | 8 of 16 (50%)                          | 18 of 40 (45%)                           |
| CDT* $\geq$ 1.7% | 8 of 16 (50%)                          | 22 of 40 (55%)                           |

\*CDT measurements only available in GALA-RIF

Abbreviation: PEth, Phosphatidylethanol; CDT, Carbohydrate-deficient transferrin

**A**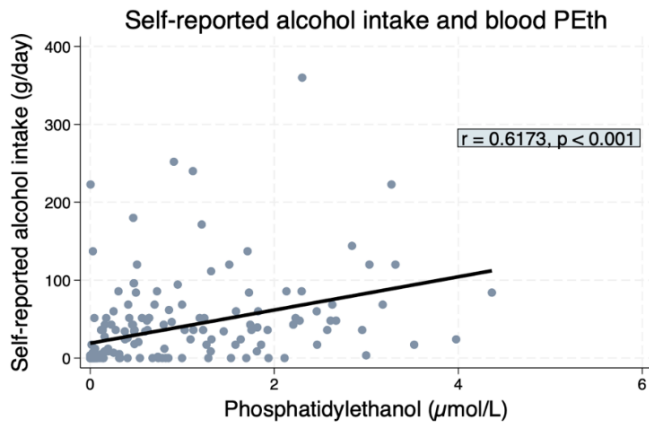**B**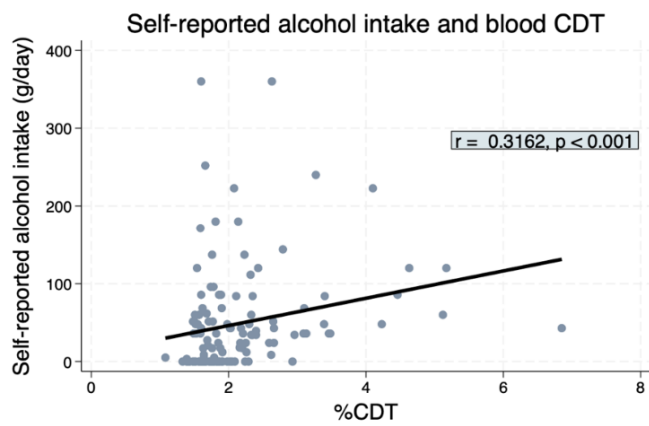**C**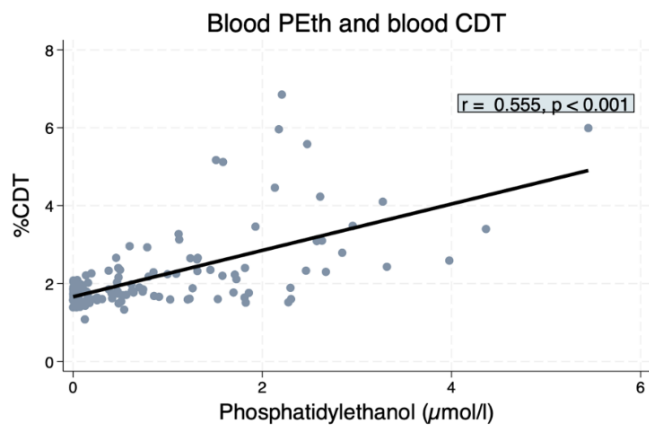

**Fig. S1: Self-reported alcohol intake and blood-based biomarkers of alcohol intake.** A-C) Scatter-plots showing Spearman's correlation between (A) self-reported alcohol intake and PEth, (B) Self-reported alcohol intake and CDT, (C) PEth and CDT. Abbreviations: CDT, Carbohydrate-deficient transferrin; PEth, Phosphatidylethanol

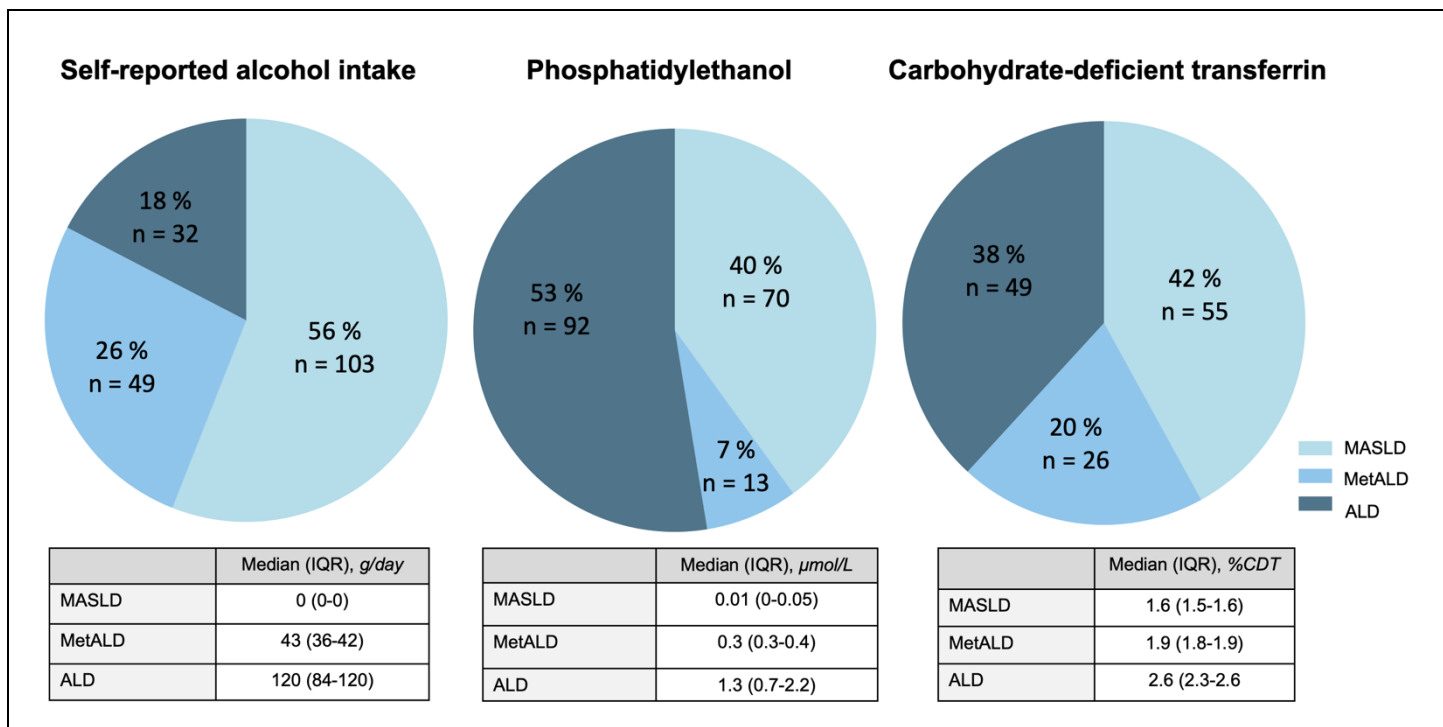

**Fig. S2** Distribution of participants in the defined groups of each assessment of alcohol intake at baseline. Self-reported alcohol intake ( $\frac{\text{g}}{\text{day}}$ ),  $<20/30 / \geq 20-50/30-60 / >50/60$  g/day. Phosphatidylethanol  $<0.21 / \geq 0.21-0.42 / >0.42$   $\mu\text{mol/L}$ . Carbohydrate-deficient transferrin,  $<1.78 / \geq 1.78-2.08 / >2.08$  %CDT.

Abbreviation: IQR, Interquartile range; ALD, alcohol-related liver disease; MetALD, metabolic dysfunction and ALD; MASLD, metabolic-dysfunction associated steatotic liver disease

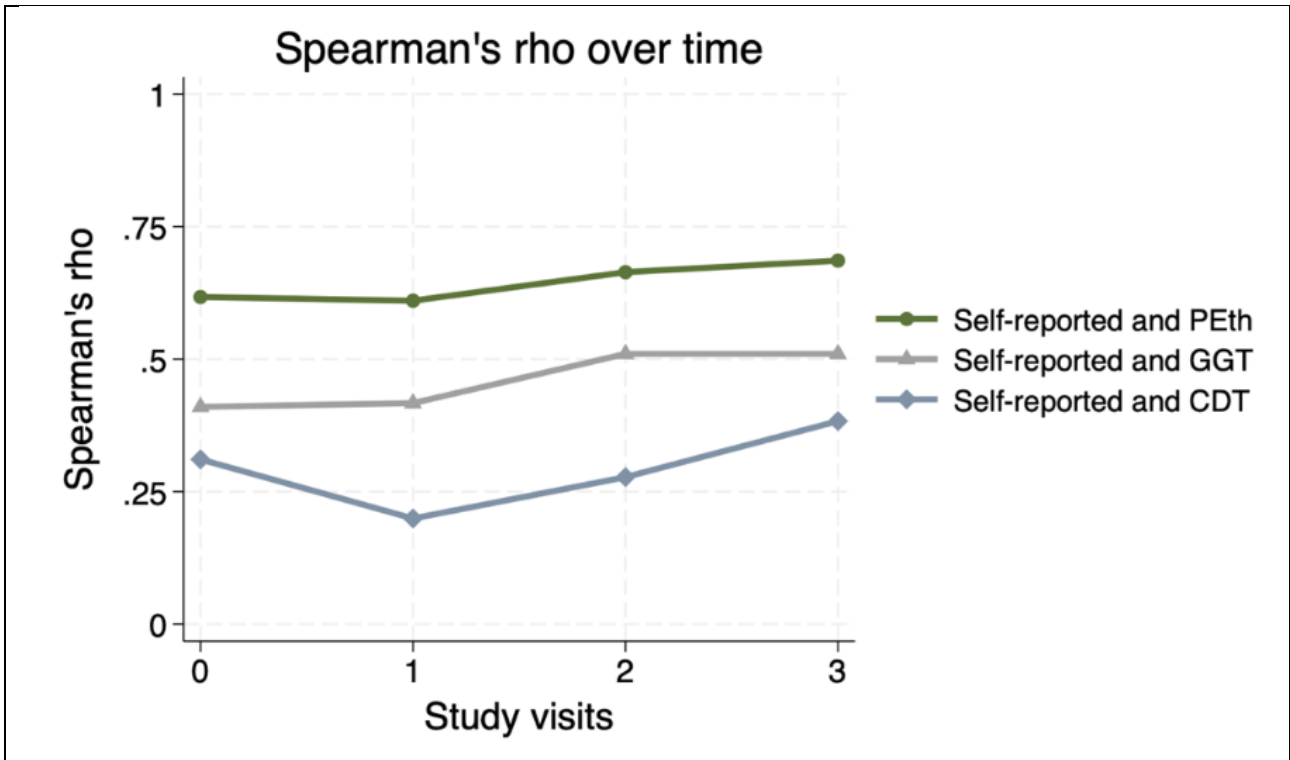

**Fig. S3** Correlation over visits by Spearman's correlation between self-reported alcohol intake and PEth, self-reported alcohol intake and CDT and self-reported alcohol intake and GGT.  
 Abbreviations: PEth, Phosphatidylethanol; CDT, Carbohydrate-deficient transferrin; GGT, Gamma-glutamyltransferase
